# Supplementary material for: Oxygen-vacancy-induced photoelectrochemical water oxidation by platelike tungsten oxide photoanodes prepared under acid-mediated hydrothermal treatment conditions
Source: Royal Society of Chemistry journal article supplement (doi:10.1039/c7ra03691d), 2017-01-01
Supplement: c7ra03691d1.pdf [file c7ra03691d1.pdf]

## Electronic Supplementary Information

Table S1. Comparison of photoelectrochemical performances of WO<sub>3</sub> photoanodes with oxygen vacancies.

| Morphology    | Preparation method                                       | Treatment                                                    | Photocurrent (mA/cm <sup>2</sup> ) at 1.23 V vs. RHE | Onset potential (V vs. RHE) | Light source                              | Ref          |
|---------------|----------------------------------------------------------|--------------------------------------------------------------|------------------------------------------------------|-----------------------------|-------------------------------------------|--------------|
| Nanoflake     | Seed-mediated solvothermal growth on FTO                 | Hydrogen annealing at 350 °C for 20 mins                     | 0.65                                                 | 0.8                         | 100 W Xe lamp                             | 29           |
| Nanoflake     | Hydrothermal growth on FTO                               | Chemical reduction using PVP                                 | 1.1                                                  | 0.75                        | 300 W Xe lamp                             | 5            |
| Particles     | Drop casting of particles synthesized via sol-gel on ITO | Annealing in air at 400 °C for 1 h                           | 0.9                                                  | 0.6                         | 300 W Xe lamp                             | a            |
| Coarse grains | Annealing RF sputtered W in air at 500 °C for 5 h        | Hydrogen plasma                                              | 0.4                                                  | 0.6                         | 150 W Xe lamp                             | b            |
| Mesoporous    | Drop casting and annealing                               | Treatment with Li-EDA (lithium dissolved in ethylenediamine) | 2.75                                                 | 0.6                         | 100 mWcm <sup>-2</sup> simulated sunlight | c            |
| Nanowire      | Flame Vapor Deposition (FVD)                             | Using CH <sub>4</sub> gas as reducing agent                  | 0.8                                                  | 0.9                         | 100 mWcm <sup>-2</sup>                    | d            |
| Plate-like    | Acid-mediated hydrothermal treatment                     | Calcination in air                                           | 1.06                                                 | 0.75                        | 300 W Xe lamp                             | Current work |

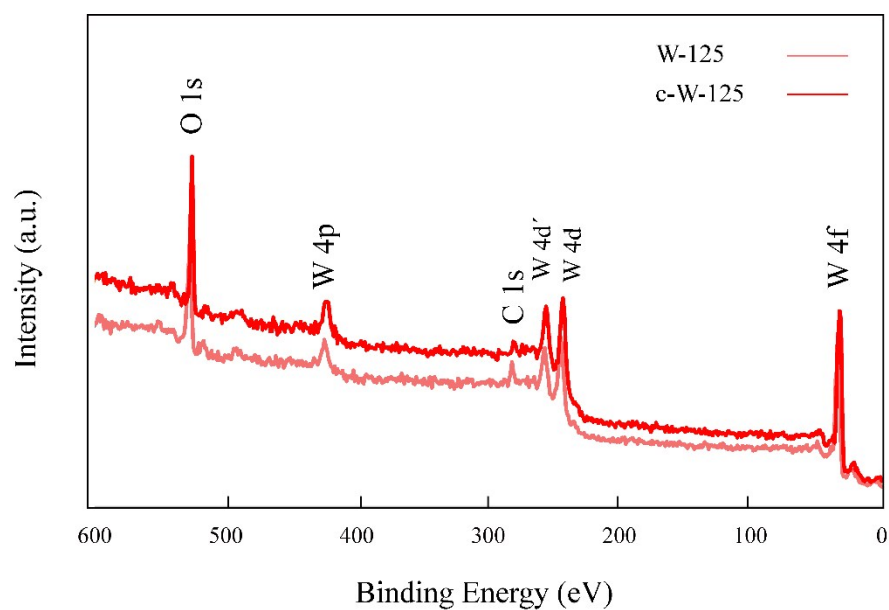

Figure S1. Wide scan X-ray photoelectron spectroscopy of samples W-125 and c-W-125.

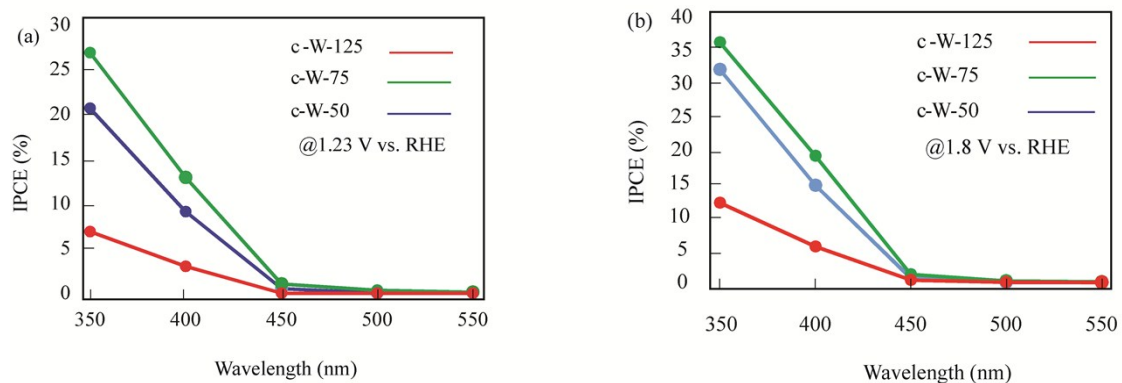

Figure S2. IPCE measurement results for c-W-50 and c-W-75 samples at (a) 1.23 V vs. RHE and (b) 1.8 V vs. RHE in 0.5 M Na<sub>2</sub>SO<sub>4</sub> (pH 5.9).

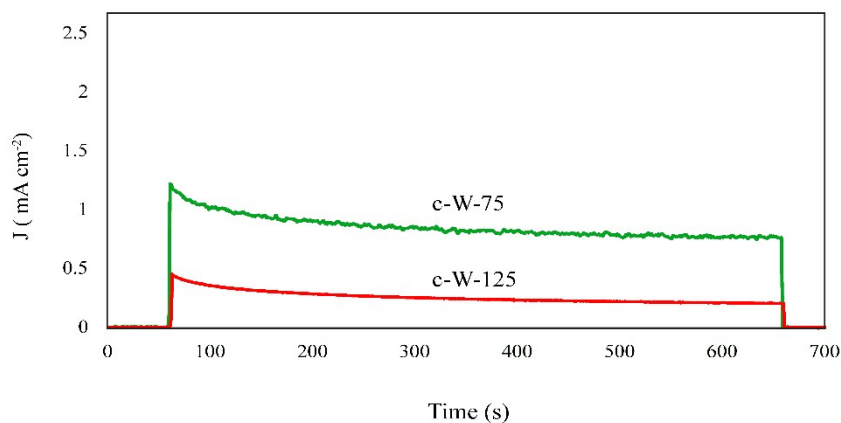

Figure S3. Steady-state photocurrent of calcinated samples prepared by acid-mediated hydrothermal treatment in 75 °C and 125 °C under applied potential of 1.5 V vs. RHE in 0.5 M Na<sub>2</sub>SO<sub>4</sub>. Illumination source was 500 W xenon lamp (285 mW/cm<sup>2</sup>).

## References

- a. N. Naseri, *Journal of alloys and compounds*, 2017, **693**, 871.
- b. T. Singh, R. Müller, J. Singh and S. Mathur, *Applied Surface Science*, 2015, **347**, 448.
- c. M. Ma, K. Zhang, P. Li, M. S. Jung, M. J. Jeong and J. H. Park, *Angew. Chem*, 2016, **128**, 1.
- d. P. M. Rao, I. D. Cho and X. Zheng, *Proceedings of the Combustion Institute*, 2013, **34(2)**, 2187.
